# Supplementary material
Source: Springer Nature journal article supplement (https://www.springermedizin.de/resource/supplementary/12981_2012_234_MOESM2_ESM.pdf/9604112)

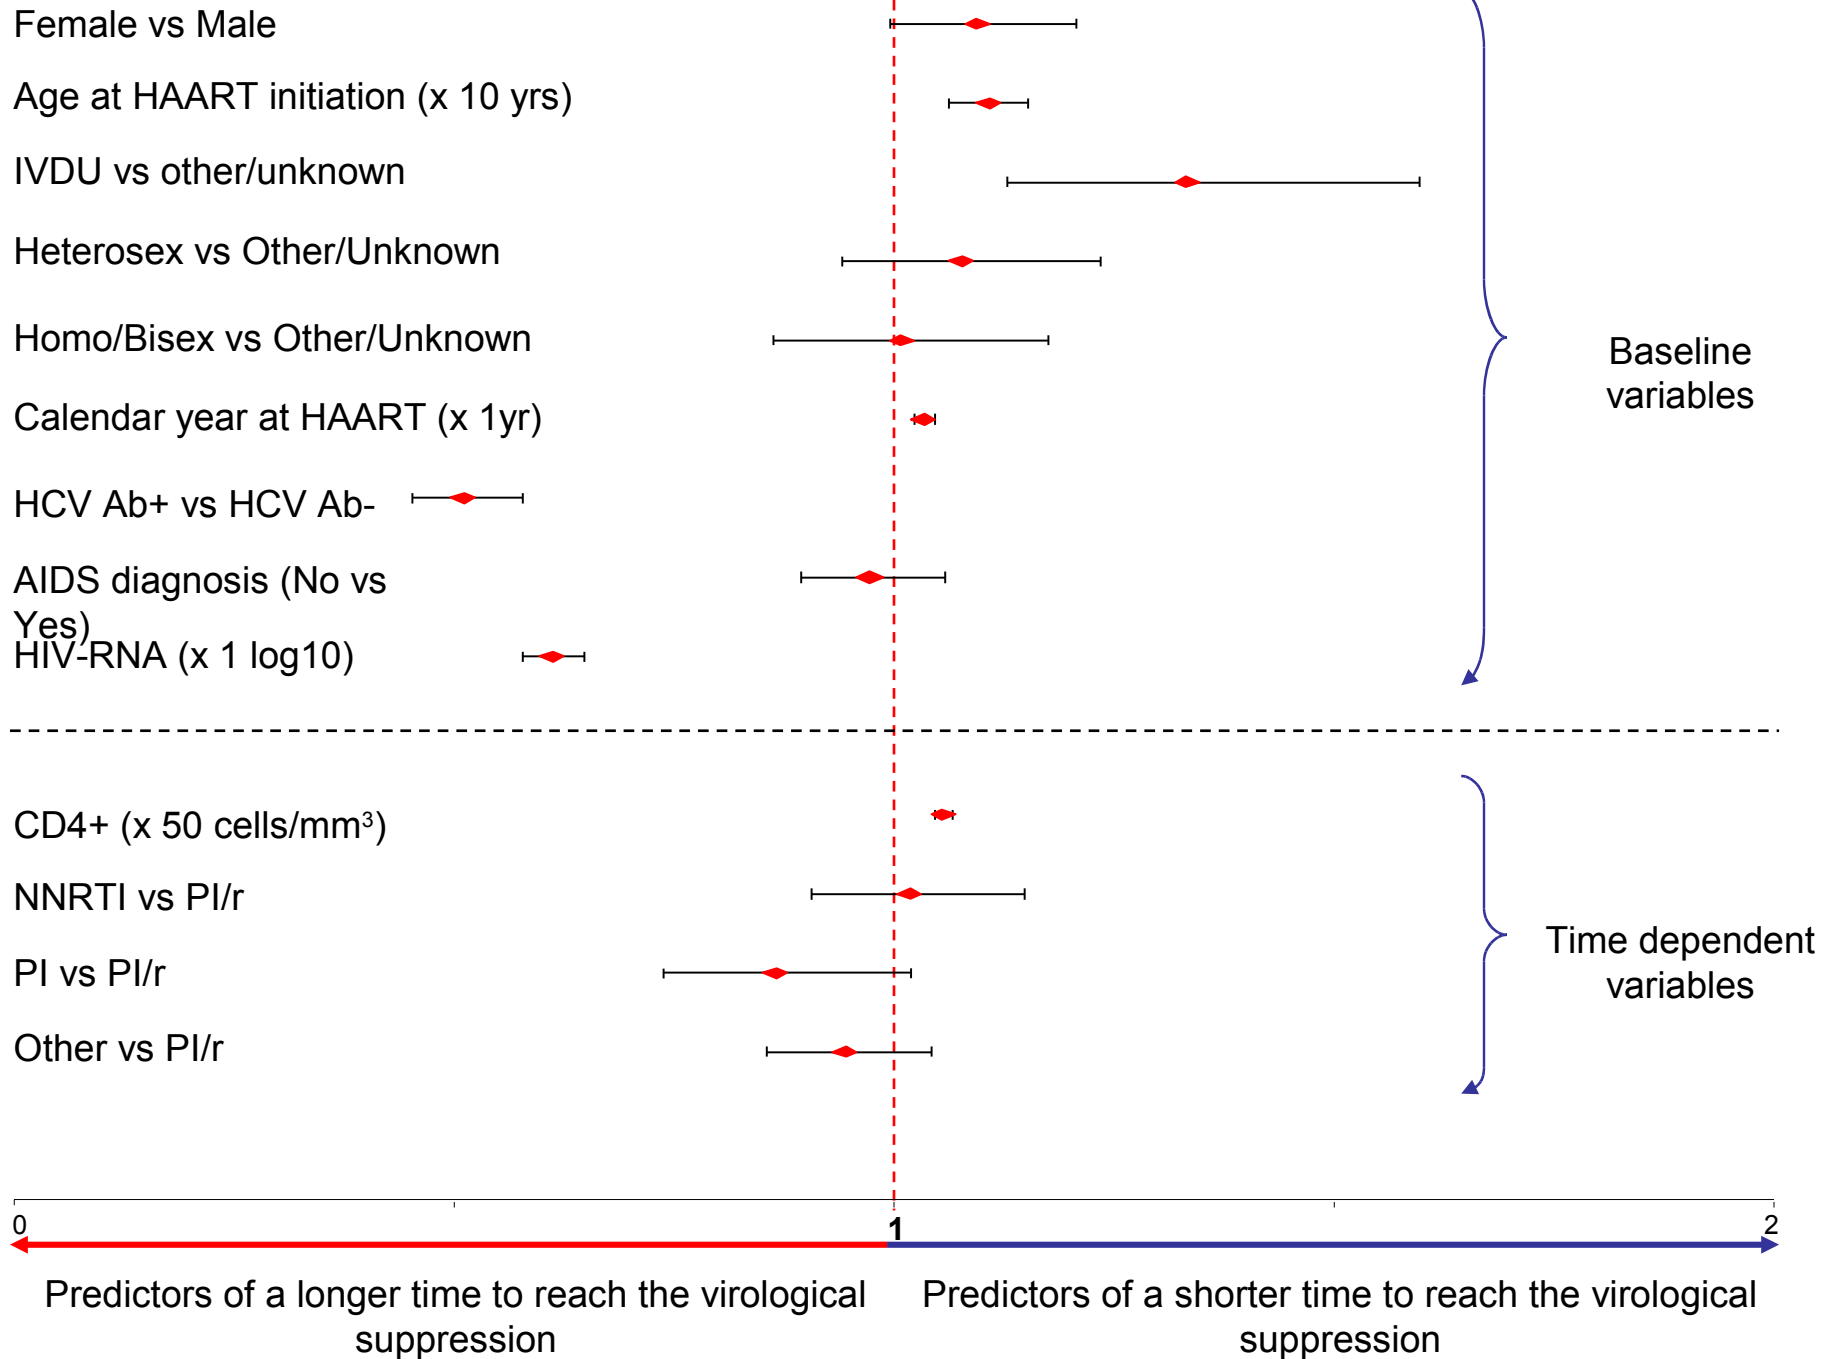

Supplement: MOESM2 [file 9604112]
